# Supplementary material for: Amplified electrochemiluminescence signals promoted by the AIE-active moiety of D–A type polymer dots for biosensing
Source: Royal Society of Chemistry journal article supplement (doi:10.1039/c9an01992h), 2019-11-08

## Supporting Information

### **The Amplified Electrochemiluminescence Signals Promoted by AIE-Active Moiety of D-A Type Polymer Dots for Biosensing**

Ziyu Wang<sup>a, †</sup>, Ningning Wang<sup>b, †</sup>, Hang Gao<sup>a</sup>, Yiwu Quan<sup>c, \*</sup>, Huangxian Ju<sup>b, \*</sup>  
and Yixiang Cheng<sup>a, \*</sup>

*<sup>a</sup>Key Lab of Mesoscopic Chemistry of MOE and Jiangsu Key Laboratory of Advanced Organic Materials, School of Chemistry and Chemical Engineering, Nanjing University, Nanjing 210023, China.*

*<sup>b</sup>State Key Laboratory of Analytical Chemistry for Life Science, School of Chemistry and Chemical Engineering, Nanjing University, Nanjing 210023, P. R. China.*

*<sup>c</sup> Key Laboratory of High Performance Polymer Material and Technology of Ministry of Education, Department of Polymer Science and Engineering, School of Chemistry and Chemical Engineering, Nanjing University, Nanjing 210023, China.*

*<sup>†</sup> These authors contributed equally to this work.*

*\*Corresponding author. E-mail: quanyiwu@nju.edu.cn; hxju@nju.edu.cn; yxcheng@nju.edu.cn*

## TABLE OF CONTENTS

### 1. Experimental Section

Materials and Reagents.....S3

Apparatus.....S3

Synthesis of **P-1**, **P-2**, **P-3** and model polymer.....S4

### 2. Supplementary Figures..... S6

Figure S1-S8

### 3. NMR Spectra.....S11

## **1. Experimental section**

### **Materials and Reagents**

Tetrahydrofuran (THF) was distilled from sodium in the presence of benzophenone. Poly(styrene-co-maleic anhydride) (PSMA) (average  $M_n$ : 1700), tri-*n*-propylamine (TPrA),  $H_2O_2$ ,  $Na_2S_2O_8$ ,  $K_2C_2O_4$ , catechol, dopamine and epinephrine were purchased from Sigma-Aldrich Co., Ltd. (Shanghai, China). All other reagents were of analytical grade and used as received. Ultrapure water obtained from a Millipore water purification system ( $\geq 18\text{ M}\Omega\text{ cm}^{-1}$ , Milli-Q, Millipore) was used in all assays. The ECL measurements were conducted in 0.1 M pH 7.4 PBS containing 0.1 M  $KNO_3$  as the electrolyte.

### **Apparatus**

Morphological studies were carried out with JEM-100S transmission electron microscopy (TEM). UV-*vis* absorption spectra were obtained using a Nanodrop-2000C UV-*vis* spectrophotometer (Thermo, USA). Fluorescence measurements were conducted on a F-7000 fluorescence spectrometer (Hitachi Co., Japan) equipped with a xenon lamp. Electrochemical experiments were performed on a CHI 660B electrochemical workstation (CH Instruments Inc., USA). ECL experiments were carried out on a MPI-E multifunctional electrochemical and chemiluminescent analytical system (Xi'an Remex Analytical Instrument Co., Ltd., China) with a self-made electrochemical cell. The ECL spectra were recorded on a CHI 660B electrochemical workstation in conjunction with a Hitachi F-7000 fluorescence spectrometer using luminescence mode under the closed shutter. NMR spectra were

obtained from Bruker Avance 400 spectrometer with 400 MHz for  $^1\text{H}$  NMR, 100 MHz, 376 MHz for  $^{19}\text{F}$  NMR and reported as parts per million (ppm) from tetramethyl silane (TMS) as internal standard. Molecular weight was determined by gel permeation chromatography (GPC) with a Waters 244 HPLC pump, and THF was used as solvent relative to polystyrene standard.

### Synthesis of P-1, P-2, P-3 and mode polymer

**Table S1. Yields and GPC data**

|               | Yield | $M_w$ | $M_n$ | PDI  |
|---------------|-------|-------|-------|------|
| <b>P-1</b>    | 88.2% | 13040 | 8390  | 1.55 |
| <b>P-2</b>    | 60.7% | 9400  | 7650  | 1.23 |
| <b>P-3</b>    | 54.3% | 7670  | 5570  | 1.38 |
| Model Polymer | 57.0% | 7650  | 6880  | 1.11 |

Synthesis of **M-3**: To a solution of **7** (1.30 g, 7.38 mmol) in ethyl acetate (15 mL),  $\text{B}_2\text{O}_3$  (0.25 g, 3.69 mmol) and **8** (2.74 g, 14.78 mmol) was added and stirred under  $60^\circ\text{C}$  for 30 min. Then  $\text{B}(\text{OBu-}n)_3$  (3.38 g, 14.78 mmol) in 10 mL was added and stirred under  $60^\circ\text{C}$  for another 30 min. After  $n\text{-BuNH}_2$  (0.21 g, 2.95 mmol) was added, the mixture was refluxed overnight and filtered to give a raw product **9** as a yellow solid. The raw product was solved in 100 mL  $\text{CH}_2\text{Cl}_2$  without purify and  $\text{BF}_3 \cdot \text{Et}_2\text{O}$  (1.50 g, 10.54 mmol) was added. After the mixture was refluxed overnight, the solvent was removed and the mixture was purified with silica gel column ( $\text{CH}_2\text{Cl}_2$  : petroleum ether = 1 : 2, v/v) to give the **M-3** as an orange solid (1.66 g, 40.4%).  $^1\text{H}$  NMR (400 MHz,  $\text{CDCl}_3$ )  $\delta$ : 8.020 (d,  $J$  = 15.5 Hz, 2H), 7.565-7.549 (m, 3H), 7.494-7.473 (d,  $J$  = 8.5 Hz, 4H), 7.321-7.298 (m, 2H), 7.260 (d,  $J$  = 8.5 Hz, 4H), 6.510 (d,  $J$

= 15.5 Hz, 2H).  $^{13}\text{C}$  NMR (100 MHz,  $\text{CDCl}_3$ )  $\delta$ : 178.42, 146.56, 133.08, 132.45, 131.88, 130.50, 129.37, 129.21, 126.53, 119.81.  $^{19}\text{F}$  NMR (376 MHz,  $\text{CDCl}_3$ )  $\delta$ : -140.15.

Synthesis of model polymer: **M-1** (0.200 g, 0.380 mmol), **M-2** (0.190 g, 0.380 mmol),  $\text{Pd}(\text{PPh}_3)_4$  (0.050 g, 5% e. q.) and  $\text{K}_2\text{CO}_3$  (4.56 g, 33.043 mmol) were dissolved in 23 mL toluene and 15 mL water. The reaction was processed through the method of **P-1** and gave model polymer as a brown solid (0.131 g, 57.0%).  $^1\text{H}$  NMR (400 MHz,  $\text{CDCl}_3$ )  $\delta$  8.42-8.08 (m, 2H), 7.73-7.61 (m, 2H), 7.54-7.34 (m, 6H), 7.54-7.36 (m, 14H), 4.30-4.27 (m, 2H), 1.86-1.85 (m, 1H), 1.61 (s, 2H), 1.32-1.24 (m, 10H), 0.88-0.82 (m, 2H). GPC data:  $M_w = 7650$ ,  $M_n = 6880$ , PDI = 1.11.

Synthesis of **P-1**: **M-1** (0.120 g, 0.230 mmol), **M-2** (0.100 g, 0.219 mmol), **M-3** (0.007 g, 0.011 mmol) and  $\text{Pd}(\text{PPh}_3)_4$  (0.028 g, 5% e.q.) were dissolved in 14 mL toluene and 9 mL  $\text{K}_2\text{CO}_3$  aqueous solution (2 M) was added. The mixture was stirred for 48 h under 75 °C in Ar atmosphere. The reaction mixture was then cooled to room temperature and the organic layer was separated out. After the solvent was removed, the mixture was dissolved in 1 mL  $\text{CH}_2\text{Cl}_2$ , added in 300 mL  $\text{CH}_3\text{OH}$  and stirred for another 30 min. The mixture was filtered and gave **P-1** as a brown solid (0.080 g, 58.0%).  $^1\text{H}$  NMR (400 MHz,  $\text{CDCl}_3$ )  $\delta$  7.73-7.67 (m, 2H), 7.49-7.39 (m, 6H), 7.25-7.10 (m, 16H), 4.32-4.28 (m, 2H), 1.88-1.87 (m, 1H), 1.33-1.24 (m, 12H), 0.86-0.84 (m, 2H). GPC data:  $M_w = 13040$ ,  $M_n = 8390$ , PDI = 1.55.

Synthesis of **P-2**: **M-1** (0.120 g, 0.230 mmol), **M-2** (0.095 g, 0.208 mmol), **M-3** (0.014 g, 0.022 mmol) and  $\text{Pd}(\text{PPh}_3)_4$  (0.028 g, 5% e.q.) were dissolved in 14 mL

toluene and 9 mL  $K_2CO_3$  aqueous solution (2 M) was added. The reaction was processed with the method of **P-1** and gave **P-2** as a brown solid (0.085 g, 60.7%).  $^1H$  NMR (400 MHz,  $CDCl_3$ )  $\delta$  7.68-7.65 (m, 2H), 7.51-7.41 (m, 7H), 7.22-7.10 (m, 13H), 4.27 (s, 2H), 1.85 (s, 2H), 1.31-1.23 (m, 12H), 0.86-0.84 (m, 3H). GPC data:  $M_w = 9400$ ,  $M_n = 7650$ , PDI = 1.23.

Synthesis of **P-3**: **M-1** (0.120 g, 0.230 mmol), **M-2** (0.084 g, 0.186 mmol), **M-3** (0.028 g, 0.044 mmol) and  $Pd(PPh_3)_4$  (0.028 g, 5% e.q.) were dissolved in 14 mL toluene and 9 mL  $K_2CO_3$  aqueous solution (2 M) was added. The reaction was processed with the method of **P-1** and gave **P-3** as a dark red solid (0.076 g, 54.3%).  $^1H$  NMR (400 MHz,  $CDCl_3$ )  $\delta$  7.73-7.66 (m, 2H), 7.51-7.40 (m, 6H), 7.15-7.04 (m, 16H), 4.31 (s, 2H), 1.26 (s, 12H), 0.87-0.84 (m, 3H). GPC data:  $M_w = 7670$ ,  $M_n = 5570$ , PDI = 1.38.

## 2. Supplementary Figures

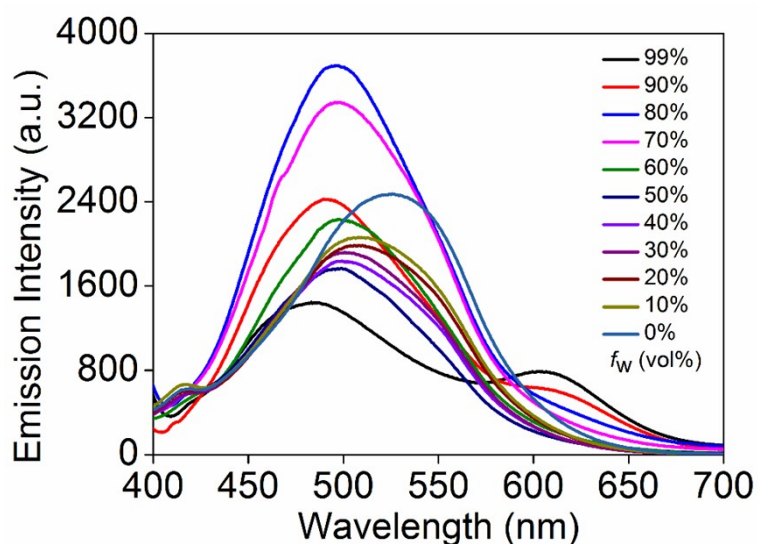

**Fig. S1** The Fluorescence spectra of **P-2** ( $1 \times 10^{-5}$  M corresponding to carbazole moiety in THF- $H_2O$  mixtures,  $\lambda_{ex} = 370$  nm)

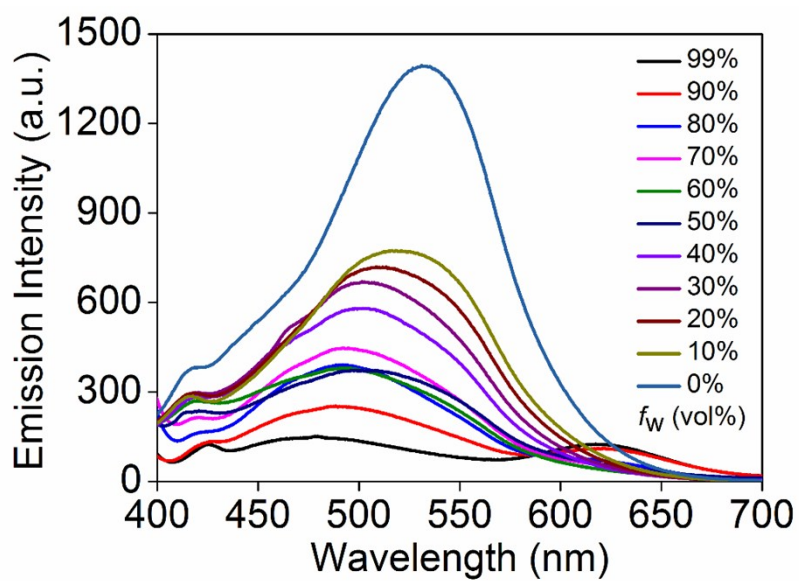

**Fig. S2** The Fluorescence spectra of **P-3** ( $1 \times 10^{-5}$  M corresponding to carbazole moiety in THF-H<sub>2</sub>O mixtures,  $\lambda_{\text{ex}} = 370$  nm)

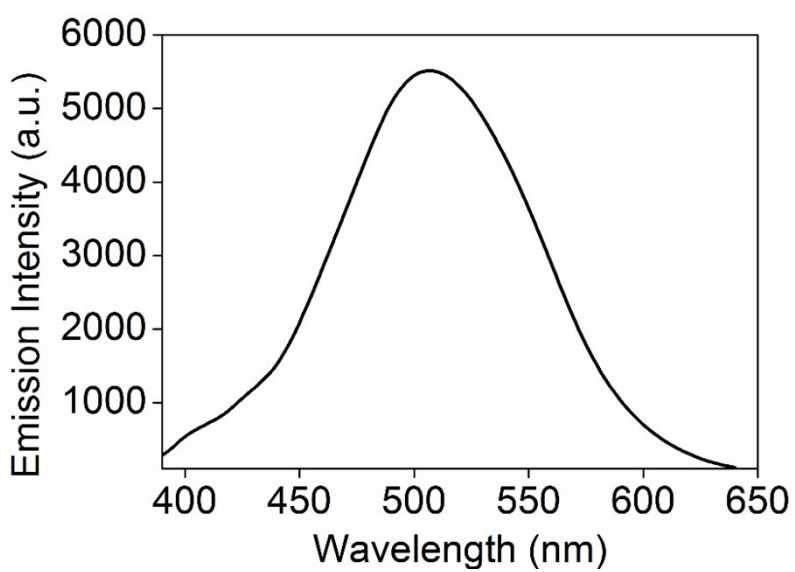

**Fig. S3** The fluorescence spectra of model polymer in THF ( $1 \times 10^{-5}$  M corresponding to carbazole moiety in THF,  $\lambda_{\text{ex}} = 370$  nm)

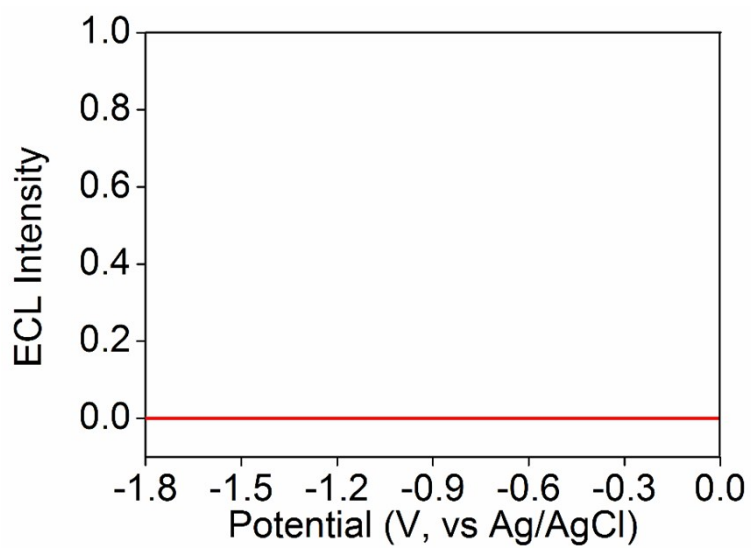

**Fig. S4** ECL–potential curves of **P-1** to **P-3** Pdots in 0.1 M PBS (pH = 7.4) containing 0.1 M KNO<sub>3</sub> and 25 mM H<sub>2</sub>O<sub>2</sub> or Na<sub>2</sub>S<sub>2</sub>O<sub>8</sub> (PMT set at 400 V).

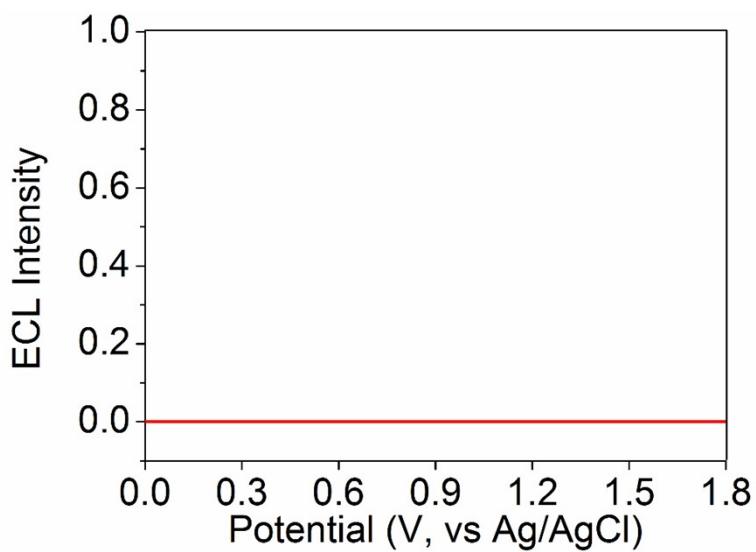

**Fig. S5** ECL–potential curves of **P-1** to **P-3** Pdots in 0.1 M PBS (pH = 7.4) containing 0.1 M KNO<sub>3</sub> and 25 mM K<sub>2</sub>C<sub>2</sub>O<sub>4</sub> (PMT set at 400 V).



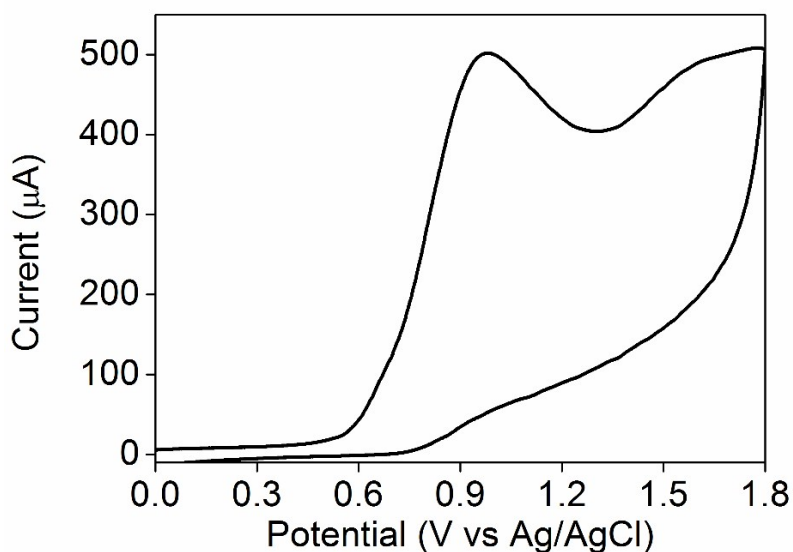

**Fig. S6** CV of bare GCE in 0.1 M pH 7.4 PBS in the presence of 0.1 M TPrA as anodic co-reactant. Scan rate: 100 mV s<sup>-1</sup>.

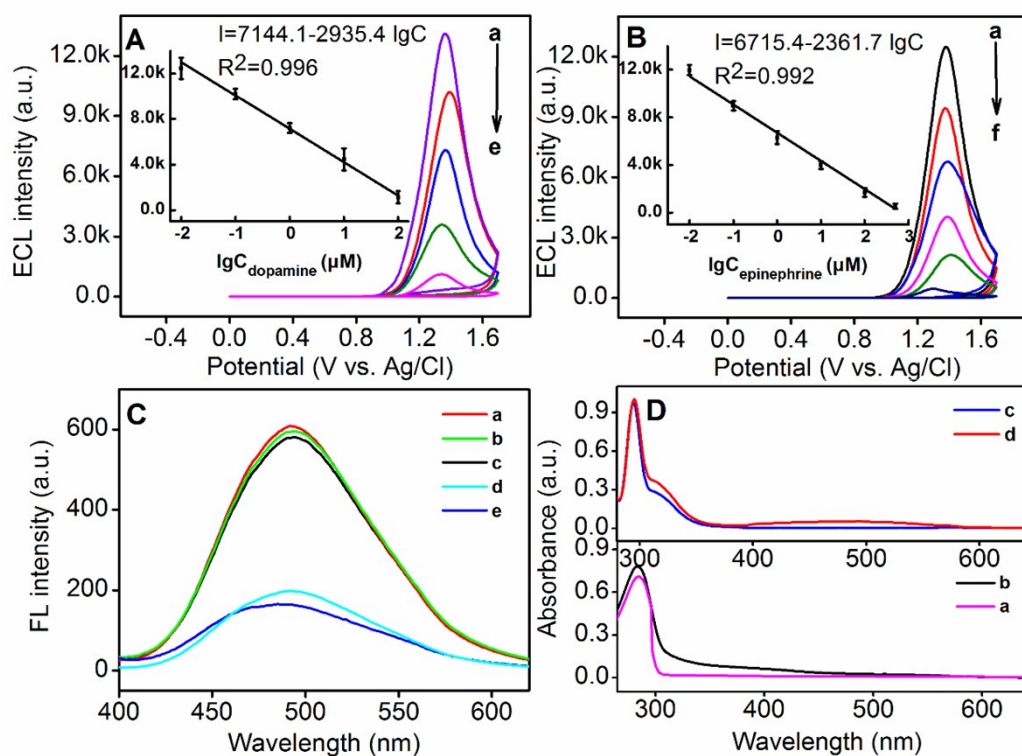

**Fig. S7.** (A) ECL–potential curves of Pdots in the presence of 0.01, 0.1, 1, 10, 100 and 500  $\mu$ M epinephrine (a to f) Inset: plot of ECL intensity vs. logarithm value of epinephrine concentration. (PMT set at 500 V) (B) ECL–potential curves of Pdots in

the presence of 0.01, 0.1, 1, 10, 100  $\mu\text{M}$  dopamine (a to e) Inset: plot of ECL intensity vs. logarithm value of dopamine concentration. (PMT set at 500 V) (C) FL spectra of Pdots in (a) absence and (b–d) presence of 100  $\mu\text{M}$  epinephrine (b) or dopamine(c), and 100  $\mu\text{M}$  oxidized epinephrine (d) or oxidized dopamine (e). (D) UV–vis absorption spectra of epinephrine (a) and oxidized epinephrine (b), dopamine (c) and oxidized dopamine(d).

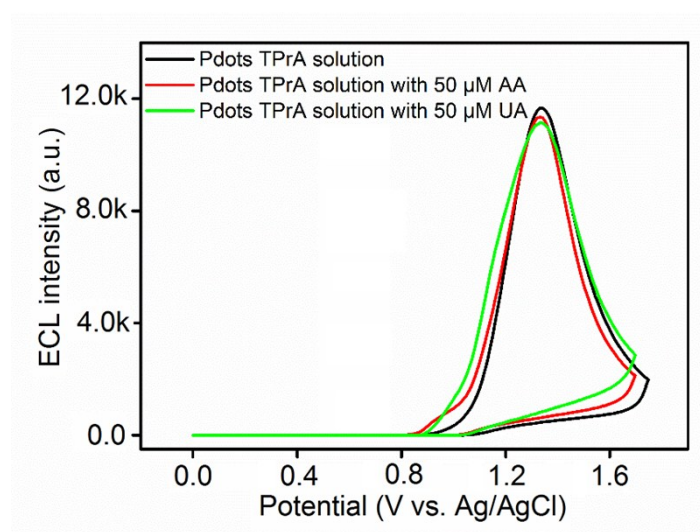

**Fig. S8.** ECL–potential curves of 0.1 M pH 7.4 PBS containing 25  $\mu\text{g mL}^{-1}$  Pdots and 25mM TPrA in absence (black curve) and presence of 50  $\mu\text{M}$  AA (red curve) and UA (green curve). (PMT set at 500 V)

### 3. NMR Spectra

#### $^1\text{H}$ NMR of M-3

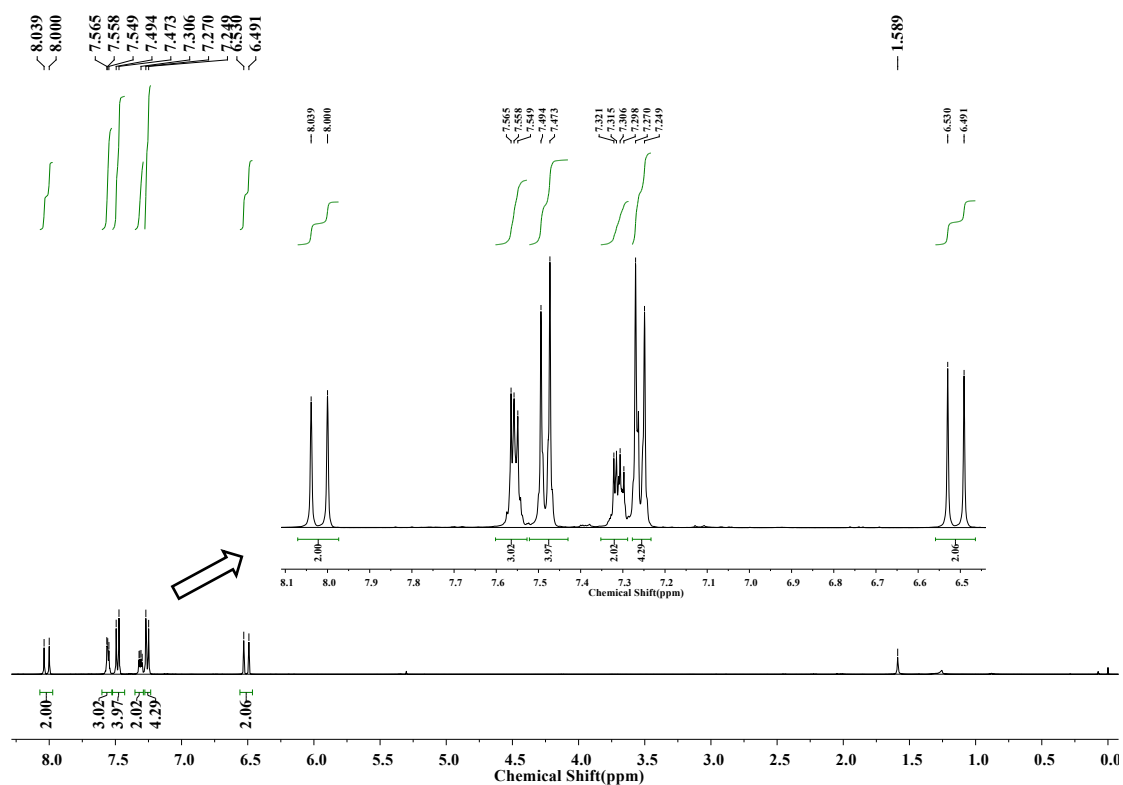

#### $^{13}\text{C}$ NMR of M-3

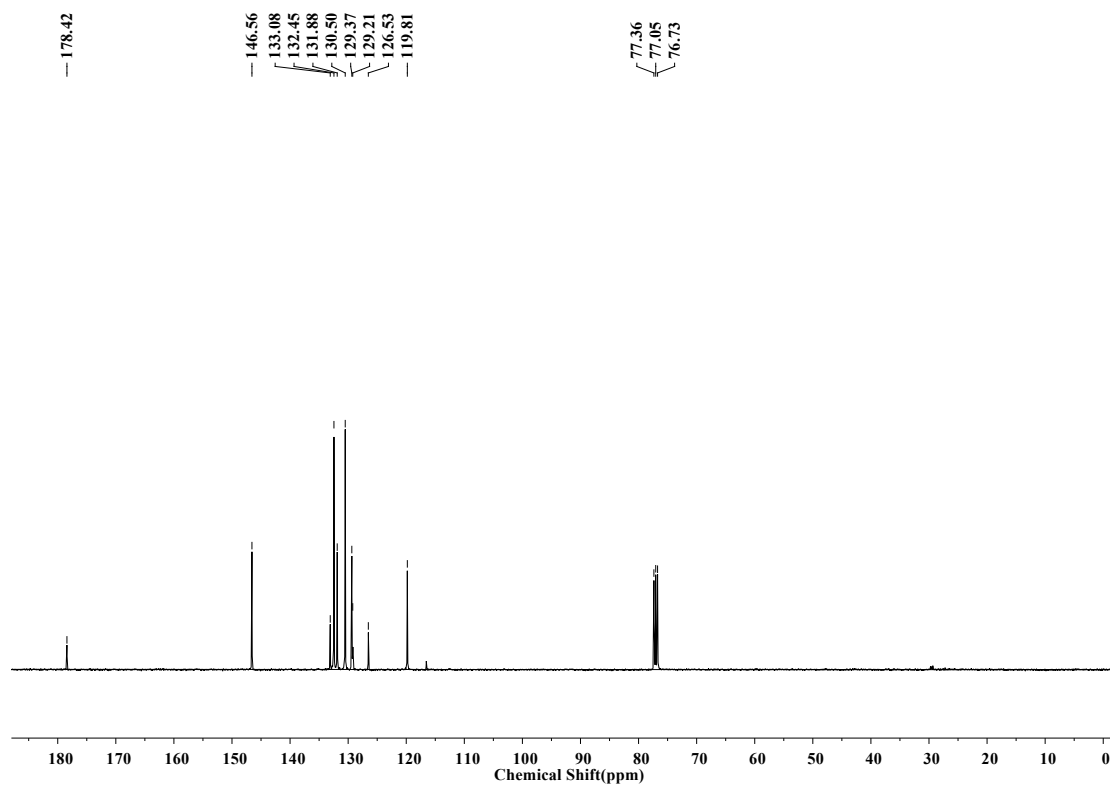

$^{19}\text{F}$  NMR of **M-3**

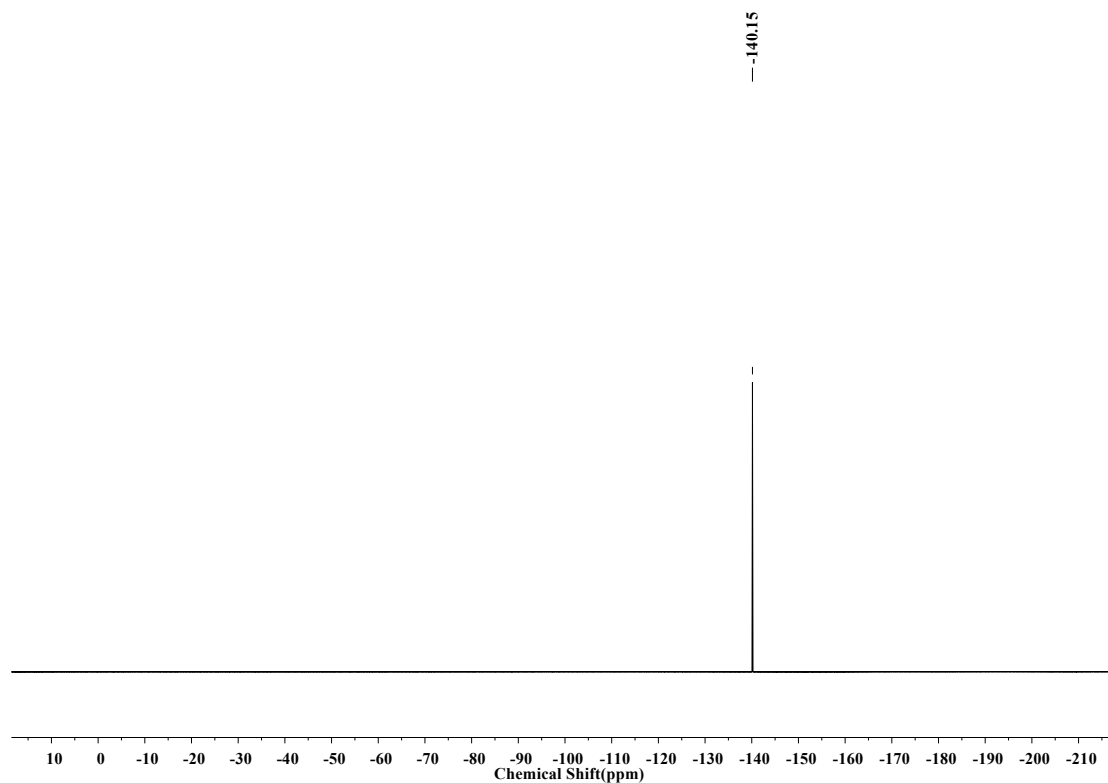

$^1\text{H}$  NMR of model polymer

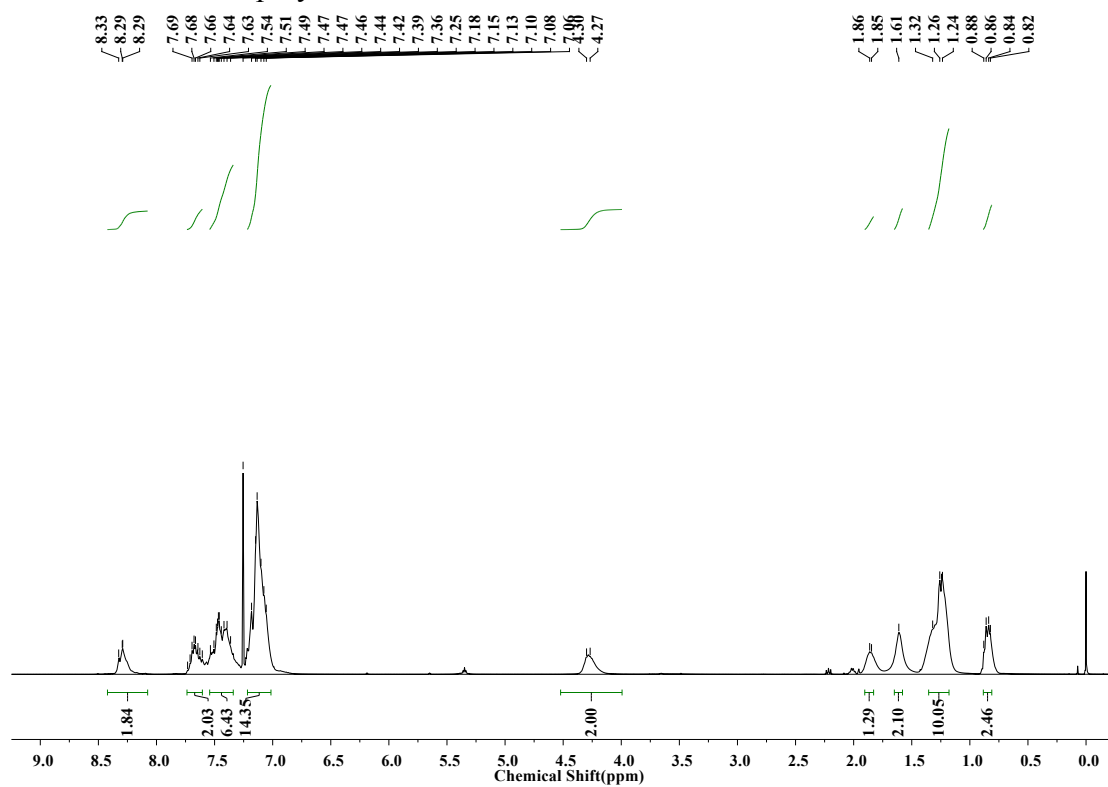

# <sup>1</sup>H NMR of P-1

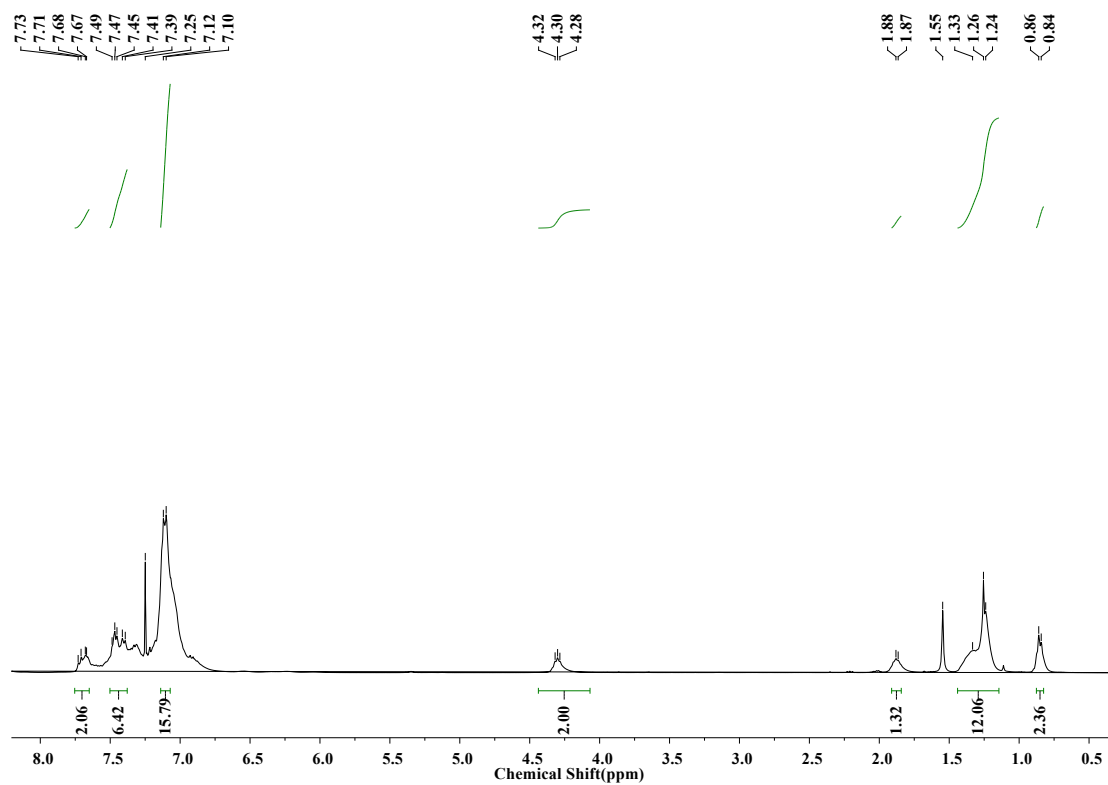

# <sup>1</sup>H NMR of P-2

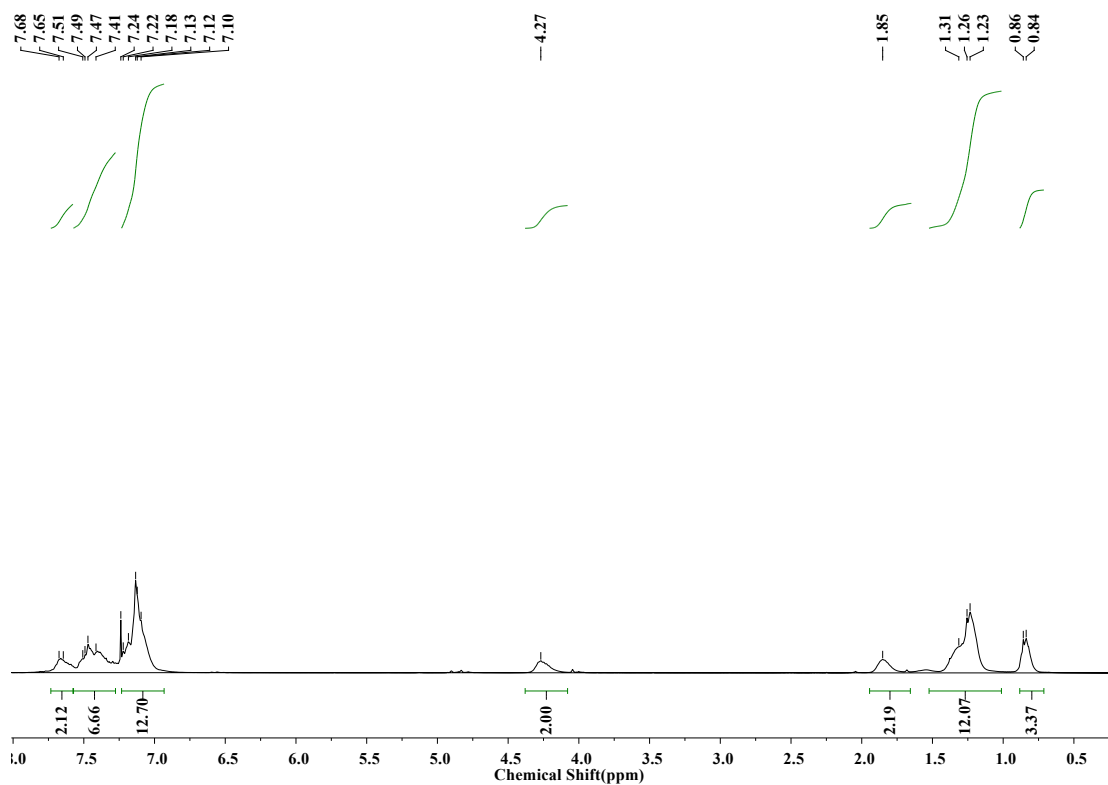

# <sup>1</sup>H NMR of P-3

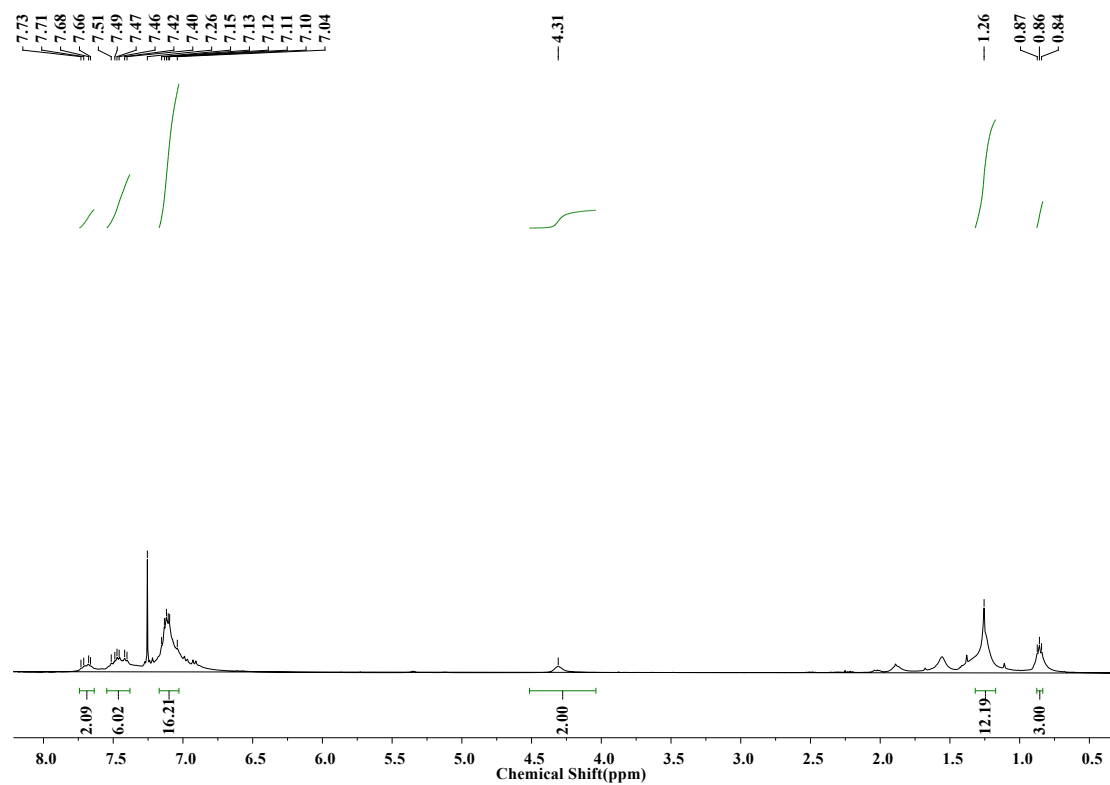

Supplement: c9an01992h1.pdf [file c9an01992h1.pdf]
